# Supplementary material
Source: publisher figshare collection journal article supplement (https://frontiersin.figshare.com/ndownloader/files/22534343)

### Kaplan-Meier plot

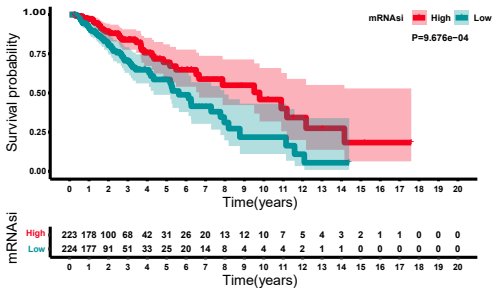

### Kaplan-Meier plot

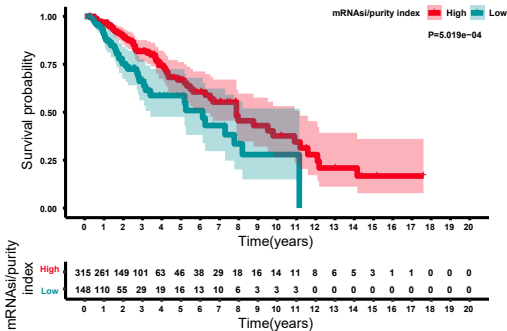

Supplement: Supplementary file [file 22534343]
